# Supplementary material for: Emergent multi-field interaction in a magnetic quasi-two-dimensional WSe2/SrCoO2.5/2DEG heterojunction
Source: Royal Society of Chemistry journal article supplement (doi:10.1039/d4tc02341b), 2024-01-01
Supplement: d4tc02341b1.pdf [file d4tc02341b1.pdf]

## Supplementary information

### Emergent multi-field interaction in a magnetic quasi-two-dimensional WSe<sub>2</sub>/SrCoO<sub>2.5</sub>/2DEG heterojunction

Xinyue Zhang, ‡<sup>a</sup> Chenyu Xu, ‡<sup>a</sup> Guangyao Sun,<sup>a</sup> Kaifeng Li,<sup>b</sup> Hao Yang,<sup>b</sup> Guozhen Liu,<sup>a</sup> Yucheng

Jiang,<sup>a</sup> Ju Gao,<sup>a</sup> Hao Lu,<sup>\*c</sup> Run Zhao<sup>\*a</sup> and Wei Tian<sup>\*d</sup>

a. School of Physical Science and Technology, Suzhou University of Science and Technology. No. 99

Xuefu Road, Suzhou 215009, China. Email: zr@usts.edu.cn

b. MIIT Key Laboratory of Aerospace Information Materials and Physics, College of Physics, Nanjing

University of Aeronautics and Astronautics, No. 29 Jiangjun Road, Nanjing 211106, China.

c. Institute of Materials Science & Devices, School of Materials Science and Engineering, Suzhou

University of Science and Technology, No. 99 Xuefu Road, Suzhou 215009, China. Email:

d. School of Physical Science and Technology, Center for Energy Conversion Materials & Physics

(CECMP), Soochow University, No. 1 Shizi Street, Suzhou 215006, China.

‡Xinyue Zhang and Chenyu Xu contributed equally to this paper.

\* Corresponding authors:

Email: luhaoshaobo@163.com (Hao Lu), zr@usts.edu.cn (Run Zhao) wtian@suda.edu.cn (Wei Tian)

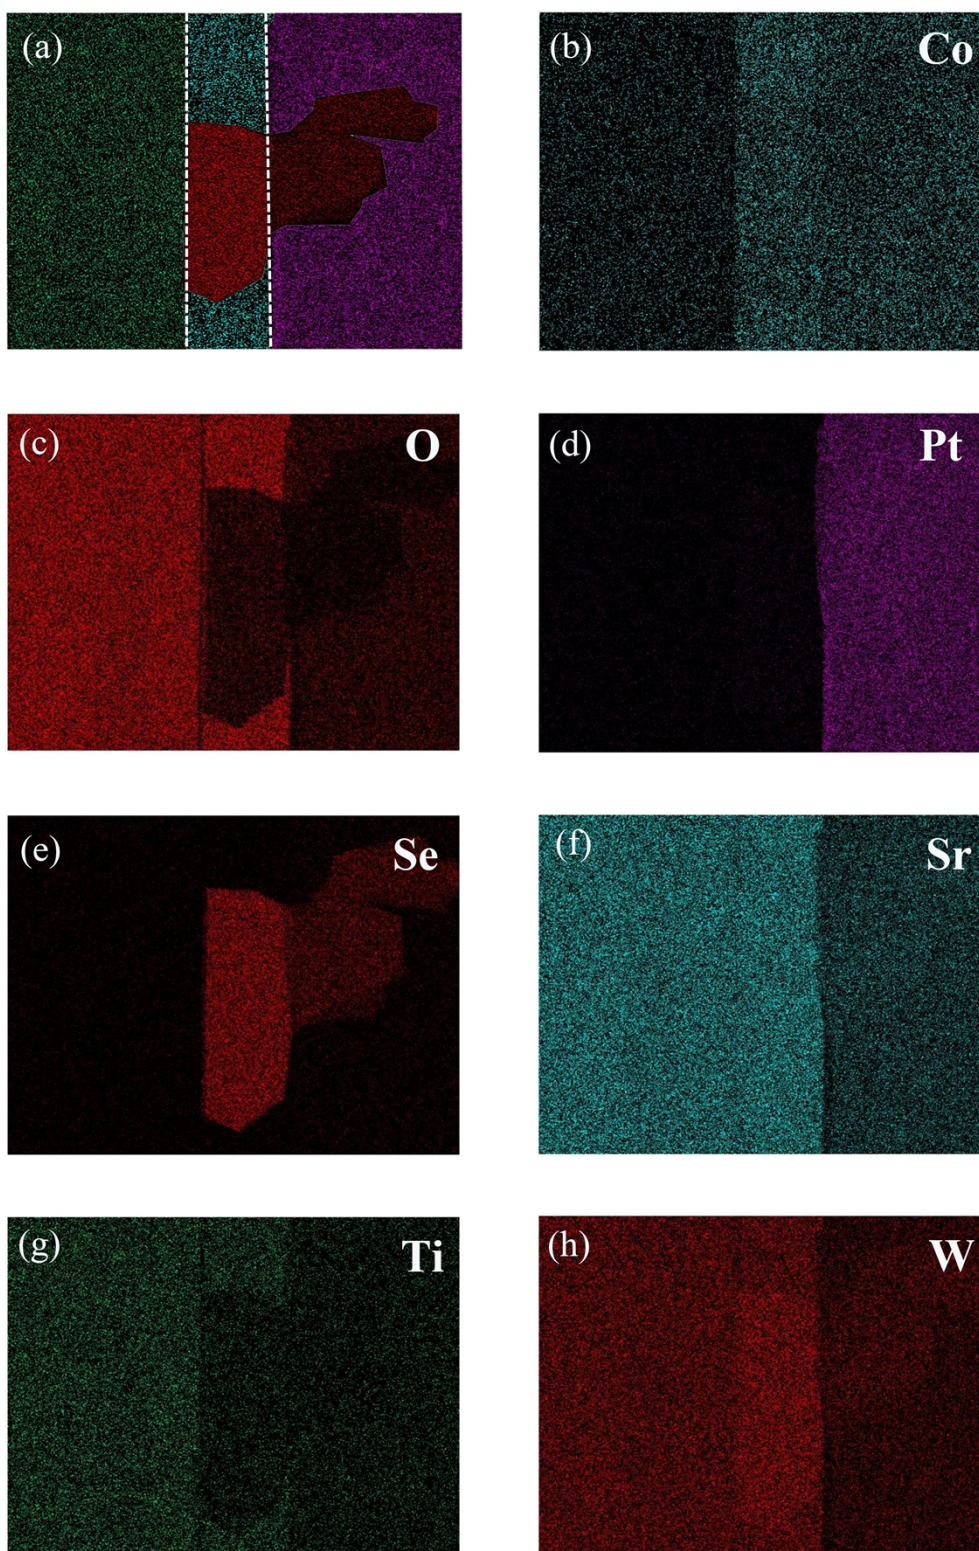

**Fig. S1.** The separated elemental distribution mapping of EDAX for the device.

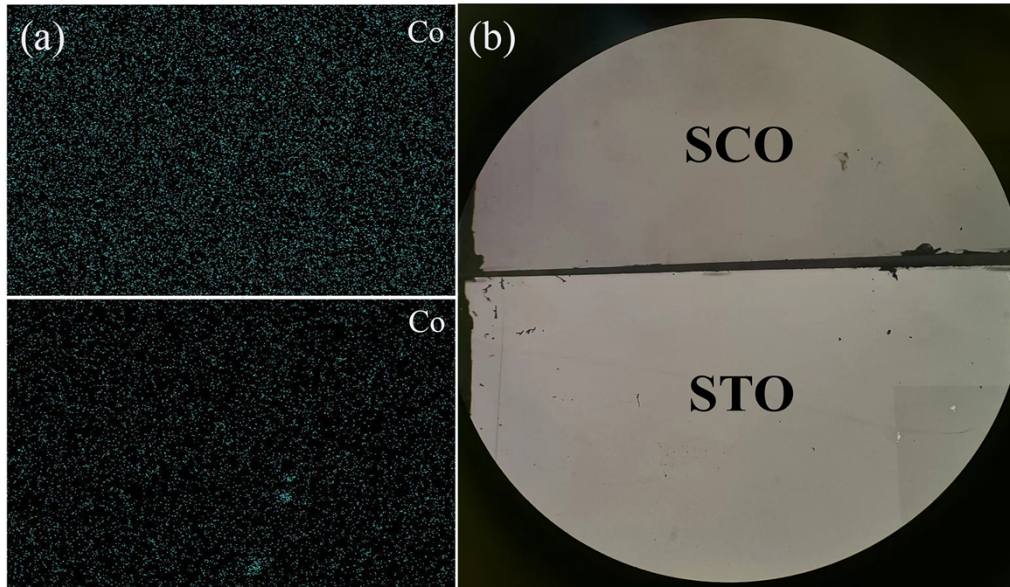

**Fig. S2.** (a)The elemental Co distribution mapping of EDAX and (b) optical morphology images of the  $\text{SrCoO}_{2.5}$  thin film before and after the etching.

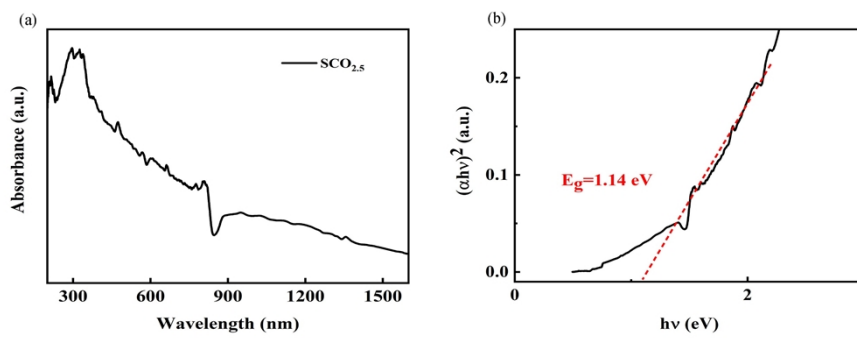

**Fig. S3.** (a) Absorption spectrum and (b) bandgap fitting of the SrCoO<sub>2.5</sub> film.

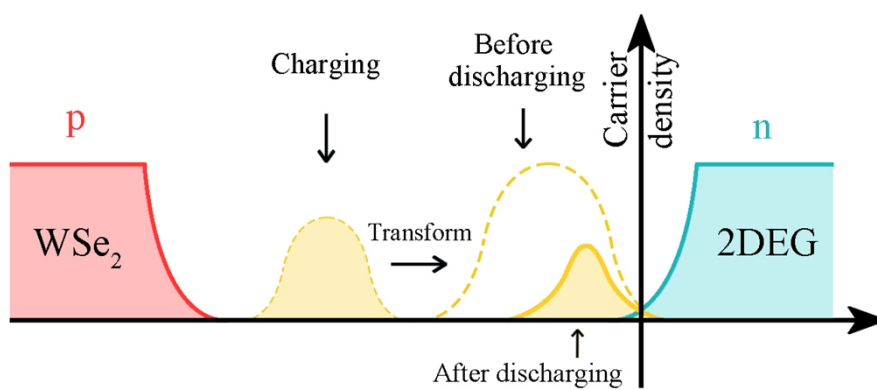

**Fig. S4.** Schematic of the optical charging and discharging through the storage and release of photocarriers stored in the space charge region.

**Table S1** Comparative results in the photosensitivity of three heterojunctions at room temperature.

| Parameter                                    | $I_{\text{dark}}$ (nA) | $I_{\text{light}} (\times 10^3 \text{ nA})$ | Switching ratio | Rectification ratio | Response time (ms) |
|----------------------------------------------|------------------------|---------------------------------------------|-----------------|---------------------|--------------------|
| WSe <sub>2</sub> /SrCoO <sub>2.5</sub> /2DEG | -1                     | 2.4                                         | 3               | 10 <sup>3</sup>     | 45                 |
| WSe <sub>2</sub> /TiO <sub>2</sub> /2DEG     | -5                     | 1.5                                         | 105             | 10 <sup>3</sup>     | 60                 |
| WSe <sub>2</sub> /2DEG                       | -35                    | 0.7                                         | 30              | 10 <sup>2</sup>     | 200                |
